# Supplementary material for: Performance Characteristics of the Vidas SARS-CoV-2 IgM and IgG Serological Assays
Source: PubMed Central journal article supplement (PMC8092742; doi:10.1128/jcm.02292-20), 2021-03-19
Supplement: JCM.02292-20-s0001.pdf [file JCM.02292-20-s0001.pdf]

## Supplemental Material

**Table S1. Precision of the VIDAS® SARS-CoV-2 IgM and IgG assays**

| VIDAS® SARS-CoV-2 assay | Sample             | Total number of measurements | Mean index | Repeatability (within-run precision) |        | Within-laboratory precision |        |
|-------------------------|--------------------|------------------------------|------------|--------------------------------------|--------|-----------------------------|--------|
|                         |                    |                              |            | SD                                   | CV (%) | SD                          | CV (%) |
| IgM                     | A (negative, high) | 60                           | 0.95       | 0.08                                 | 8.5    | 0.09                        | 9.4    |
|                         | B (positive)       | 60                           | 1.50       | 0.14                                 | 9.3    | 0.16                        | 10.7   |
|                         | C (positive)       | 60                           | 5.78       | 0.42                                 | 7.3    | 0.46                        | 8.0    |
| IgG                     | D (negative, high) | 60                           | 0.88       | 0.03                                 | 3.8    | 0.04                        | 4.5    |
|                         | E (positive)       | 60                           | 1.42       | 0.08                                 | 5.5    | 0.09                        | 6.5    |
|                         | F (positive)       | 60                           | 8.04       | 0.48                                 | 5.9    | 0.55                        | 6.9    |

Abbreviations: SD, standard deviation; CV, coefficient of variation

**Table S2. Demographics of pre-pandemic healthy volunteers used for the determination of VIDAS® SARS-CoV-2 IgM and IgG specificity**

| VIDAS® SARS-CoV-2 serology testing     | IgM         | IgG         | Combined IgM/IgG |
|----------------------------------------|-------------|-------------|------------------|
| Study population, N (%)                | 308 (100%)  | 989 (100%)  | 308 (100%)       |
| Age in years, median (range)           | 45 (18-86)  | 44 (18-86)  | 45 (18-86)       |
| Gender, N (%)                          |             |             |                  |
| Male                                   | 143 (46.4%) | 347 (35.1%) | 143 (46.4%)      |
| Female                                 | 165 (53.6%) | 642 (64.9%) | 165 (53.6%)      |
| Pre-pandemic healthy volunteers, N (%) |             |             |                  |
| France                                 | 161 (52.3%) | 842 (85.1%) | 161 (52.3%)      |
| United States                          | 147 (47.7%) | 147 (14.9%) | 147 (47.7%)      |

**Table S3. Specificity of the VIDAS® SARS-CoV-2 IgM and IgG assays**

| VIDAS® SARS-CoV-2 serology testing | No. samples | No. negative results | Specificity | 95% confidence interval (95% CI) |
|------------------------------------|-------------|----------------------|-------------|----------------------------------|
| IgM                                | 308         | 306                  | 99.4%       | 97.7-99.9%                       |
| IgG <sup>a</sup>                   | 989         | 988                  | 99.9%       | 99.4-100.0%                      |
| Combined IgM/IgG <sup>b</sup>      | 308         | 306                  | 99.4%       | 97.7-99.9%                       |

<sup>a</sup>Specificity (95% CI) determined based on common samples (N=308) was 100.0% (98.8-100.0%); <sup>b</sup>combined test is negative when both IgM and IgG tests are negative

**Table S4. Positive percent agreement (PPA) of the VIDAS® SARS-CoV-2 IgM and IgG test results according to the time from RT-PCR-positive test result (all available samples)**

| VIDAS® SARS-CoV-2 serology testing | Time from RT-PCR-positive result | Median (range) time in days | No. samples <sup>a</sup> | No. positive results | PPA    | 95% CI      |
|------------------------------------|----------------------------------|-----------------------------|--------------------------|----------------------|--------|-------------|
| <b>IgM (N=234)<sup>b</sup></b>     | 0-7 days                         | 1.5 (0-7)                   | 112                      | 51                   | 45.5%  | 36.6-54.8%  |
|                                    | 8-15 days                        | 14 (8-15)                   | 60                       | 49                   | 81.7%  | 70.1-89.4%  |
|                                    | 16-23 days                       | 20 (16-23)                  | 38                       | 31                   | 81.6%  | 66.6-90.8%  |
|                                    | 24-31 days                       | 26 (24-28)                  | 13                       | 13                   | 100.0% | 75.3-100.0% |
|                                    | ≥ 32 days                        | 33 (32-65)                  | 11                       | 9                    | 81.8%  | 52.3-94.9%  |
| <b>IgG (N=253)<sup>b</sup></b>     | 0-7 days                         | 1 (0-7)                     | 115                      | 47                   | 40.9%  | 32.3-50.0%  |
|                                    | 8-15 days                        | 14 (8-15)                   | 73                       | 63                   | 86.3%  | 76.6-92.4%  |
|                                    | 16-23 days                       | 20 (16-23)                  | 41                       | 39                   | 95.1%  | 83.5-99.4%  |
|                                    | 24-31 days                       | 26 (24-28)                  | 13                       | 13                   | 100.0% | 75.3-100.0% |
|                                    | ≥ 32 days                        | 33 (32-65)                  | 11                       | 11                   | 100.0% | 71.5-100.0% |

<sup>a</sup>no more than one test result per patient per time period; <sup>b</sup>PPA (95% CI) for common samples (N=232) are shown in Table 4

**Table S5. Positive percent agreement (PPA) of the VIDAS® SARS-CoV-2 IgM and IgG test results according to the time from symptom onset (all available samples)**

| VIDAS® SARS-CoV-2 serology testing | Time from symptom onset | Median (range) time in days | No. samples <sup>a</sup> | No. positive results | PPA    | 95% CI      |
|------------------------------------|-------------------------|-----------------------------|--------------------------|----------------------|--------|-------------|
| <b>IgM (N=108)<sup>b</sup></b>     | 0-7 days                | 6 (1-7)                     | 24                       | 9                    | 37.5%  | 21.2-57.3%  |
|                                    | 8-15 days               | 12 (8-15)                   | 29                       | 24                   | 82.8%  | 65.5-92.4%  |
|                                    | 16-23 days              | 18 (16-23)                  | 26                       | 26                   | 100.0% | 86.8-100.0% |
|                                    | 24-31 days              | 26 (24-30)                  | 18                       | 18                   | 100.0% | 81.5-100.0% |
|                                    | ≥ 32 days               | 34 (32-65)                  | 11                       | 11                   | 100.0% | 71.5-100.0% |
| <b>IgG (N=113)<sup>b</sup></b>     | 0-7 days                | 5.5 (1-7)                   | 24                       | 9                    | 37.5%  | 21.2-57.3%  |
|                                    | 8-15 days               | 12 (8-15)                   | 31                       | 25                   | 80.6%  | 63.7-90.8%  |
|                                    | 16-23 days              | 18 (16-23)                  | 29                       | 28                   | 96.6%  | 82.2-99.9%  |
|                                    | 24-31 days              | 26 (24-30)                  | 19                       | 18                   | 94.7%  | 75.4-99.1%  |
|                                    | ≥ 32 days               | 35 (32-65)                  | 10                       | 10                   | 100.0% | 69.2-100.0% |

<sup>a</sup>no more than one test result per patient per time period; <sup>b</sup>PPA (95% CI) for common samples (N=105) are shown in Table 5

**Table S6. Positive percent agreement (PPA) of the VIDAS® SARS-CoV-2 combined IgM/IgG test results and respective number of IgM and IgG positive test results of SARS-CoV-2-positive samples, according to the time from RT-PCR-positive result and of symptom onset**

| VIDAS® SARS-CoV-2 serology testing                                 | Time window in days <sup>a</sup> | Median (range) time in days <sup>a</sup> | No. samples <sup>b</sup> | No. positive results <sup>c</sup> | VIDAS® IgM positive & IgG negative | VIDAS® IgM positive & IgG positive | VIDAS® IgM negative & IgG positive | PPA    | 95% CI      |
|--------------------------------------------------------------------|----------------------------------|------------------------------------------|--------------------------|-----------------------------------|------------------------------------|------------------------------------|------------------------------------|--------|-------------|
| <b>Results relative to documented date of RT-PCR-positive test</b> |                                  |                                          |                          |                                   |                                    |                                    |                                    |        |             |
| <b>Combined IgM/IgG<sup>c</sup> (N=232)</b>                        | 0-7                              | 2 (0-7)                                  | 110                      | 59                                | 9                                  | 40                                 | 10                                 | 53.6%  | 44.4-62.7%  |
|                                                                    | 8-15                             | 14 (8-15)                                | 60                       | 57                                | 4                                  | 45                                 | 8                                  | 95.0%  | 86.1-99.0%  |
|                                                                    | 16-23                            | 20 (16-23)                               | 38                       | 38                                | 2                                  | 29                                 | 7                                  | 100.0% | 90.7-100.0% |
|                                                                    | 24-31                            | 26 (24-28)                               | 13                       | 13                                | 0                                  | 13                                 | 0                                  | 100.0% | 75.3-100.0% |
|                                                                    | ≥ 32                             | 33 (32-65)                               | 11                       | 11                                | 0                                  | 9                                  | 2                                  | 100.0% | 71.5-100.0% |
| <b>Results relative to documented date of symptom onset</b>        |                                  |                                          |                          |                                   |                                    |                                    |                                    |        |             |
| <b>Combined IgM/IgG<sup>c</sup> (N=105)</b>                        | 0-7                              | 5.5 (1-7)                                | 22                       | 8                                 | 1                                  | 6                                  | 1                                  | 36.4%  | 19.7-57.0%  |
|                                                                    | 8-15                             | 12 (8-15)                                | 29                       | 26                                | 1                                  | 23                                 | 2                                  | 89.7%  | 73.6-96.4%  |
|                                                                    | 16-23                            | 18 (16-23)                               | 26                       | 26                                | 1                                  | 25                                 | 0                                  | 100.0% | 86.8-100.0% |
|                                                                    | 24-31                            | 26 (24-30)                               | 18                       | 18                                | 1                                  | 17                                 | 0                                  | 100.0% | 81.5-100.0% |
|                                                                    | ≥ 32                             | 35 (32-65)                               | 10                       | 10                                | 0                                  | 10                                 | 0                                  | 100.0% | 69.2-100.0% |

<sup>a</sup>Time from RT-PCR-positive test result (upper Table) or from symptom onset (lower Table); <sup>b</sup>no more than one patient's test result per time period; <sup>c</sup>combined test is positive when at least one of IgM and/or IgG tests are positive

**Table S7. Positive and negative predictive values (PPV/NPV) at 5% prevalence of the VIDAS® SARS-CoV-2 IgM, IgG and combined IgM/IgG test results, according to the time from symptom onset (all available samples for IgG specificity)**

| VIDAS® SARS-CoV-2 serology testing | Time from symptom onset | PPV <sup>a</sup> (95% CI) | NPV <sup>a</sup> (95% CI) |
|------------------------------------|-------------------------|---------------------------|---------------------------|
| <b>IgM</b>                         | 0-7 days                | 72.1% (36.3-92.1%)        | 96.5% (95.4-97.4%)        |
|                                    | 8-15 days               | 87.0% (62.5-96.4%)        | 99.1% (98.0-99.6%)        |
|                                    | 16-23 days              | 89.0% (67.1-97.0%)        | 100.0% (N/A) <sup>b</sup> |
|                                    | 24-31 days              | 89.0% (67.1-97.0%)        | 100.0% (N/A) <sup>b</sup> |
|                                    | ≥ 32 days               | 89.0% (67.1-97.0%)        | 100.0% (N/A) <sup>b</sup> |
| <b>IgG</b>                         | 0-7 days                | 94.3% (68-99.2%)          | 96.5% (95.4-97.4%)        |
|                                    | 8-15 days               | 97.8% (86.3-99.7%)        | 99.3% (98.2-99.7%)        |
|                                    | 16-23 days              | 98.0% (87.6-99.7%)        | 99.8% (98.6-100.0%)       |
|                                    | 24-31 days              | 98.0% (87.4-99.7%)        | 99.7% (98.1-100.0%)       |
|                                    | ≥ 32 days               | 98.1% (88-99.7%)          | 100.0% (N/A) <sup>b</sup> |
| <b>Combined IgM/IgG</b>            | 0-7 days                | 74.7% (40-92.9%)          | 96.7% (95.6-97.6%)        |
|                                    | 8-15 days               | 87.9% (64.5-96.7%)        | 99.5% (98.4-99.8%)        |
|                                    | 16-23 days              | 89.0% (67.1-97.0%)        | 100.0% (N/A) <sup>b</sup> |
|                                    | 24-31 days              | 89.0% (67.1-97.0%)        | 100.0% (N/A) <sup>b</sup> |
|                                    | ≥ 32 days               | 89.0% (67.1-97.0%)        | 100.0% (N/A) <sup>b</sup> |

<sup>a</sup>PPV and NPV were calculated at 5% prevalence using values of sensitivity (PPA) determined on paired IgM and IgG test results (N=105; Table 5); values of specificity were those calculated on all available samples (N=308 for IgM and N=989 for IgG; Table 3); <sup>b</sup>95% CI not calculable (division by zero)
